# Supplementary material
Source: PubMed Central journal article supplement (PMC6902107)
Supplement: jamaophthalmol-138-50-s001.pdf [file jamaophthalmol-138-50-s001.pdf]

## Supplementary Online Content

Reibaldi M, Fallico M, Avitabile T, et al. Risk of Death Associated With Intravitreal Anti–Vascular Endothelial Growth Factor Therapy: A Systematic Review and Meta-analysis. *JAMA Ophthalmol*. Published online November 21, 2019.  
doi:10.1001/jamaophthalmol.2019.4636

**eTable 1.** PRISMA Checklist

**eTable 2.** Search Strategy

**eFigure 1.** Risk of Bias Graph

**eFigure 2.** Risk of Bias Summary

This supplementary material has been provided by the authors to give readers additional information about their work.

**eTable 1. PRISMA Checklist**

| Section/topic                      | #  | Checklist item                                                                                                                                                                                                                                                                                              | Reported on page # |
|------------------------------------|----|-------------------------------------------------------------------------------------------------------------------------------------------------------------------------------------------------------------------------------------------------------------------------------------------------------------|--------------------|
| <b>TITLE</b>                       |    |                                                                                                                                                                                                                                                                                                             | 1                  |
| Title                              | 1  | Identify the report as a systematic review, meta-analysis, or both.                                                                                                                                                                                                                                         | 1                  |
| <b>ABSTRACT</b>                    |    |                                                                                                                                                                                                                                                                                                             | 3-4                |
| Structured summary                 | 2  | Provide a structured summary including, as applicable: background; objectives; data sources; study eligibility criteria, participants, and interventions; study appraisal and synthesis methods; results; limitations; conclusions and implications of key findings; systematic review registration number. | 3-4                |
| <b>INTRODUCTION</b>                |    |                                                                                                                                                                                                                                                                                                             | 5-6                |
| Rationale                          | 3  | Describe the rationale for the review in the context of what is already known.                                                                                                                                                                                                                              | 5                  |
| Objectives                         | 4  | Provide an explicit statement of questions being addressed with reference to participants, interventions, comparisons, outcomes, and study design (PICOS).                                                                                                                                                  | 6                  |
| <b>METHODS</b>                     |    |                                                                                                                                                                                                                                                                                                             | 6-8                |
| Protocol and registration          | 5  | Indicate if a review protocol exists, if and where it can be accessed (e.g., Web address), and, if available, provide registration information including registration number.                                                                                                                               | -                  |
| Eligibility criteria               | 6  | Specify study characteristics (e.g., PICOS, length of follow-up) and report characteristics (e.g., years considered, language, publication status) used as criteria for eligibility, giving rationale.                                                                                                      | 6-7                |
| Information sources                | 7  | Describe all information sources (e.g., databases with dates of coverage, contact with study authors to identify additional studies) in the search and date last searched.                                                                                                                                  | 6                  |
| Search                             | 8  | Present full electronic search strategy for at least one database, including any limits used, such that it could be repeated.                                                                                                                                                                               | 6                  |
| Study selection                    | 9  | State the process for selecting studies (i.e., screening, eligibility, included in systematic review, and, if applicable, included in the meta-analysis).                                                                                                                                                   | 7                  |
| Data collection process            | 10 | Describe method of data extraction from reports (e.g., piloted forms, independently, in duplicate) and any processes for obtaining and confirming data from investigators.                                                                                                                                  | 7                  |
| Data items                         | 11 | List and define all variables for which data were sought (e.g., PICOS, funding sources) and any assumptions and simplifications made.                                                                                                                                                                       | 7                  |
| Risk of bias in individual studies | 12 | Describe methods used for assessing risk of bias of individual studies (including specification of whether this was done at the study or outcome level), and how this information is to be used in any data synthesis.                                                                                      | 7                  |
| Summary measures                   | 13 | State the principal summary measures (e.g., risk ratio, difference in means).                                                                                                                                                                                                                               | 8                  |
| Synthesis of results               | 14 | Describe the methods of handling data and combining results of studies, if done, including measures of consistency (e.g., I <sup>2</sup> ) for each meta-analysis.                                                                                                                                          | 8                  |

From: Moher D, Liberati A, Tetzlaff J, Altman DG, The PRISMA Group (2009). Preferred Reporting Items for Systematic Reviews and Meta-Analyses: The PRISMA Statement. PLoS Med 6(7): e1000097. doi:10.1371/journal.pmed1000097

For more information, visit: [www.prisma-statement.org](http://www.prisma-statement.org).

**eTable 2. Search Strategy**

| Relevant text of randomized clinical trial      | Relevant text of diabetic macular oedema                 |
|-------------------------------------------------|----------------------------------------------------------|
| 1. Randomized clinical trial                    | 22. Macular edema                                        |
| 2. Randomized controlled trial                  | 23. Macular oedema                                       |
| 3. Randomized                                   | 24. 22 or 23                                             |
| 4. Trial                                        | 25. Diabetic                                             |
| 5. Groups                                       | 26. Diabetes                                             |
| 6. Randomly                                     | 27. 25 or 26                                             |
| 7. Drug therapy                                 | 28. 24 and 27                                            |
| 8. Placebo                                      | <b>Relevant text of age-related macular degeneration</b> |
| 9. 1 or 2 or 3 or 4 or 5 or 6 or 7 or 8         | 29. Age related macular degeneration                     |
| <b>Relevant text of drugs</b>                   | 30. exp macular degeneration/                            |
| 10. Anti                                        | 31. exp choroidal neovascularization/                    |
| 11. Vascular endothelial growth factor          | 32. exp retinal degeneration/                            |
| 12. VEGF                                        | 33. exp. retinal neovascularization/                     |
| 13. 10 and 11, or 10 and 12                     | 34. AMD or ARM or CNV                                    |
| 14. Bevacizumab                                 | 35. Maculopathy                                          |
| 15. Ranibizumab                                 | 36. 29 or 30 or 31 or 32 or 33 or 34 or 35               |
| 16. Aflibercept                                 | <b>Combined (Final strategy)</b>                         |
| 17. Pegaptanib                                  | 37. 9 and 18 and 21                                      |
| 18. 13 or 14 or 15 or 16 or 17                  | 38. 9 and 18 and 28                                      |
| <b>Relevant test for retinal vein occlusion</b> | 39. 9 and 18 and 36                                      |
| 19. Retinal vein occlusion                      |                                                          |
| 20. RVO                                         |                                                          |
| 21. 19 or 20                                    |                                                          |

Footnote. Web sites and uniform resource locator: **PubMed:** <http://www.ncbi.nlm.nih.gov/pubmed>; **Cochrane:** <http://www.cochranelibrary.com>; **Medline:** <http://www.ovid.com/site/catalog/databases/901.jsp>;

**Embase:** <http://www.embase.com>

**eFigure 1. Risk of Bias Graph**

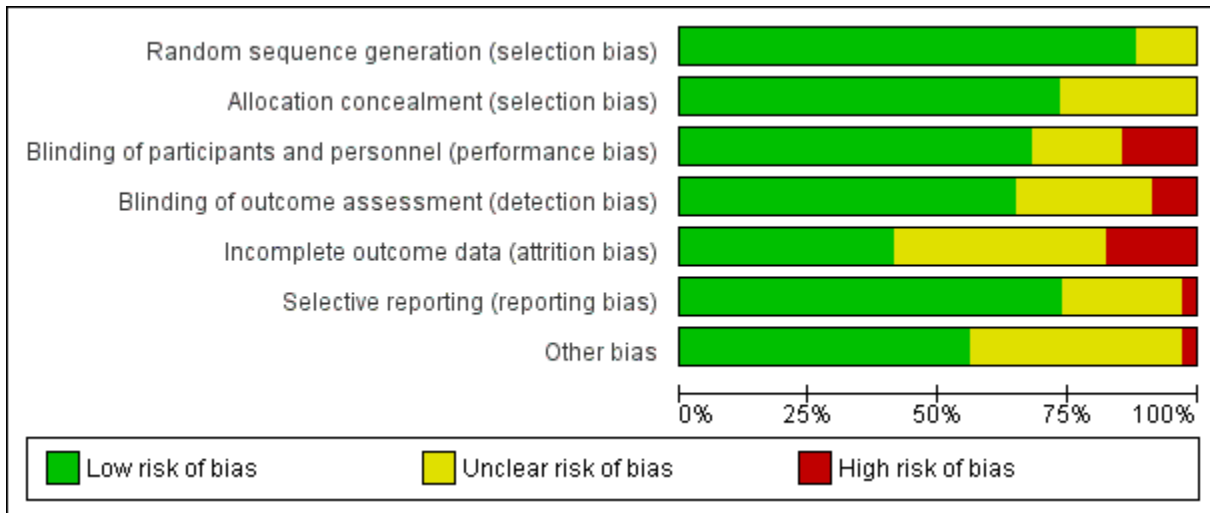

eFigure 2. Risk of Bias Summary

|                                               | Random sequence generation (selection bias) | Allocation concealment (selection bias) | Blinding of participants and personnel (performance bias) | Blinding of outcome assessment (detection bias) | Incomplete outcome data (attrition bias) | Selective reporting (reporting bias) | Other bias |
|-----------------------------------------------|---------------------------------------------|-----------------------------------------|-----------------------------------------------------------|-------------------------------------------------|------------------------------------------|--------------------------------------|------------|
| ANTONSZYK 2008                                | +                                           | +                                       | ?                                                         | +                                               | ?                                        | +                                    | ?          |
| BAKER 2019                                    | +                                           | +                                       | ?                                                         | +                                               | +                                        | +                                    | +          |
| BERGER 2015                                   | +                                           | ?                                       | +                                                         | +                                               | +                                        | +                                    | +          |
| BOYER 2012                                    | +                                           | ?                                       | +                                                         | +                                               | ?                                        | +                                    | +          |
| BROWN 2006                                    | +                                           | +                                       | +                                                         | +                                               | +                                        | +                                    | ?          |
| BROWN 2010                                    | +                                           | ?                                       | +                                                         | +                                               | ?                                        | +                                    | +          |
| BROWN VISTA 2015                              | +                                           | +                                       | +                                                         | +                                               | ?                                        | +                                    | +          |
| BROWN VIVID 2015                              | +                                           | +                                       | +                                                         | +                                               | ?                                        | +                                    | +          |
| CALLANAN 2017                                 | +                                           | ?                                       | +                                                         | +                                               | ?                                        | ?                                    | ?          |
| CAMPOCHIARO 2010                              | +                                           | ?                                       | +                                                         | +                                               | ?                                        | +                                    | +          |
| CLARK 2016                                    | +                                           | +                                       | +                                                         | ?                                               | ?                                        | +                                    | ?          |
| COMYN 2014                                    | +                                           | +                                       | +                                                         | ?                                               | +                                        | ?                                    | +          |
| DO 2012                                       | +                                           | +                                       | +                                                         | ?                                               | +                                        | +                                    | +          |
| EPSTEIN 2012                                  | ?                                           | +                                       | +                                                         | +                                               | +                                        | +                                    | +          |
| GRAGODAS 2004                                 | +                                           | +                                       | +                                                         | +                                               | +                                        | +                                    | ?          |
| HATTENBACH 2017                               | +                                           | +                                       | +                                                         | ?                                               | +                                        | ?                                    | ?          |
| HIGASHIYAMA 2013                              | +                                           | +                                       | ?                                                         | ?                                               | +                                        | ?                                    | ?          |
| ISHIBASHI 2015                                | +                                           | +                                       | +                                                         | +                                               | +                                        | ?                                    | +          |
| KINGE 2010                                    | ?                                           | +                                       | +                                                         | +                                               | ?                                        | +                                    | ?          |
| KOH 2012                                      | +                                           | ?                                       | +                                                         | ?                                               | +                                        | ?                                    | ?          |
| KOROBELNIK 2014                               | ?                                           | ?                                       | +                                                         | +                                               | ?                                        | +                                    | ?          |
| KRIECHBAUM 2014                               | +                                           | +                                       | ?                                                         | ?                                               | +                                        | ?                                    | ?          |
| Macugen Diabetic Retinopathy Study Group 2005 | +                                           | +                                       | +                                                         | +                                               | +                                        | +                                    | +          |
| MASSIN 2010                                   | +                                           | +                                       | +                                                         | ?                                               | +                                        | +                                    | +          |
| MITCHELL 2011                                 | +                                           | +                                       | +                                                         | +                                               | +                                        | +                                    | +          |
| NGUYEN 2009                                   | ?                                           | ?                                       | +                                                         | +                                               | ?                                        | +                                    | +          |
| NGUYEN 2012                                   | +                                           | +                                       | +                                                         | +                                               | ?                                        | +                                    | +          |
| PIELEN 2015                                   | +                                           | +                                       | ?                                                         | +                                               | +                                        | +                                    | +          |
| RAMEZANI 2012                                 | +                                           | +                                       | +                                                         | +                                               | +                                        | +                                    | +          |
| REGILLO 2008                                  | +                                           | ?                                       | +                                                         | +                                               | +                                        | +                                    | ?          |
| SACU 2009                                     | +                                           | +                                       | +                                                         | +                                               | +                                        | +                                    | +          |
| SCOTT 2007                                    | +                                           | +                                       | +                                                         | ?                                               | +                                        | ?                                    | ?          |
| TADAYONI 2016                                 | +                                           | +                                       | ?                                                         | +                                               | ?                                        | +                                    | ?          |
| WROBLEWSKI 2009                               | +                                           | +                                       | +                                                         | +                                               | ?                                        | +                                    | +          |
